# Supplementary material for: Tethering of vesicles to the Golgi by GMAP210 controls LAT delivery to the immune synapse
Source: PubMed Central journal article supplement (PMC6599081; doi:10.1038/s41467-019-10891-w), 2019-06-28
Supplement: 41467_2019_10891_MOESM4_ESM.pdf [file 41467_2019_10891_MOESM4_ESM.pdf]

## **Description of Additional Supplementary Files**

### **Supplementary Movie 1:**

GMAP210 is recruited together with LAT at the immune synapse. Time-lapse TIRF microscopy of Jurkat cells co-transfected with Lat-mCherry (red) and GMAP210-GFP (green) seeded on coverslips coated with anti-CD3 $\epsilon$  +antiCD28 Abs. Left: Lat-mCherry, middle: GMAP210-GFP, right: merge. Scale bar 5 $\mu$ m.”
